# Supplementary material for: DOG1 is commonly expressed in pancreatic adenocarcinoma but unrelated to cancer aggressiveness
Source: PeerJ. 2021 Aug 3;9:e11905. doi: 10.7717/peerj.11905 (PMC8344676; doi:10.7717/peerj.11905)
Supplement: Supplemental Information 1 [file peerj-09-11905-s001.xlsx]

## Sheet: PAN5.2 DOG1 Rev-Mi
Histology	pT	pN	Grade	Resection margin	DOG1 intensity	DOG1 % stained tumor cells
Adenocarcinoma	pT≥3	pN+	1	R0	1	30
Adenocarcinoma	pT≥3	pN+	1		,
Adenocarcinoma	pT≥3	pN0		R0	0
Adenocarcinoma	pT2	pN+	1	R0	,
Adenocarcinoma	pT≥3	pN+	1	R0	3	100
Adenocarcinoma	pT2	pN+	1	R0	0
Adenocarcinoma	pT≥3	pN+	1	R1	0
Adenocarcinoma	pT≥3	pN+	1	R0	3	100
Adenocarcinoma	pT≥3	pN+	1	R1	2	70
Adenocarcinoma		pN+	1	R1	0
Adenocarcinoma	pT≥3	pN+	1		2	60
Adenocarcinoma	pT2	pN0	1	R0	,
Adenocarcinoma	pT2	pN+	1	R1	0
Adenocarcinoma	pT≥3	pN+	1	R1	1	20
Adenocarcinoma	pT≥3	pN+	1	R0	,
Adenocarcinoma	pT≥3	pN0	1	R0	4
Adenocarcinoma	pT1	pN0	1	R0	,
Adenocarcinoma	pT2	pN+	1	R0	3	100
Adenocarcinoma	pT≥3	pN+	2		,
Adenocarcinoma	pT≥3	pN+	2	R0	1	50
Adenocarcinoma	pT≥3	pN+	2	R1	1	70
Adenocarcinoma	pT≥3	pN+	2	R1	,
Adenocarcinoma	pT≥3	pN+	2	R1	0
Adenocarcinoma	pT≥3	pN0	2	R0	0
Adenocarcinoma	pT≥3	pN+	2	R0	0
Adenocarcinoma	pT≥3	pN+	2	R1	4
Adenocarcinoma	pT≥3	pN0	2	R1	4
Adenocarcinoma	pT≥3	pN0	2	R0	0
Adenocarcinoma	pT≥3	pN0	2	R1	0
Adenocarcinoma	pT≥3	pN+	2	R0	2	30
Adenocarcinoma	pT≥3	pN+	2		0
Adenocarcinoma	pT≥3	pN+	2	R1	1	100
Adenocarcinoma	pT≥3	pN+	2	R0	0
Adenocarcinoma	pT≥3	pN+	2	R0	0
Adenocarcinoma	pT≥3	pN0	2	R0	1	30
Adenocarcinoma	pT≥3	pN+	2	R1	0
Adenocarcinoma	pT≥3	pN+	2	R1	,
Adenocarcinoma	pT≥3	pN+	2		2	100
Adenocarcinoma	pT≥3	pN+	2	R1	,
Adenocarcinoma	pT2	pN+	2	R0	,
Adenocarcinoma	pT≥3	pN0	2	R0	0
Adenocarcinoma	pT≥3	pN0	2	R0	1	10
Adenocarcinoma	pT≥3	pN+	2	R1	0
Adenocarcinoma	pT≥3	pN+	2	R1	2	100
Adenocarcinoma	pT≥3	pN+	2	R0	2	70
Adenocarcinoma	pT≥3	pN+	2	R0	0
Adenocarcinoma	pT≥3	pN+	2	R1	0
Adenocarcinoma	pT≥3	pN0	2	R0	0
Adenocarcinoma	pT≥3	pN+	2	R0	0
Adenocarcinoma	pT≥3	pN+	2	R1	0
Adenocarcinoma	pT≥3	pN0	2	R1	1	10
Adenocarcinoma	pT≥3	pN+	2	R1	2	100
Adenocarcinoma	pT≥3	pN+	2	R0	0
Adenocarcinoma	pT≥3	pN+	2	R0	0
Adenocarcinoma	pT≥3	pN+	2	R0	3	30
Adenocarcinoma	pT≥3	pN+	2	R1	2	100
Adenocarcinoma	pT≥3	pN+	2	R1	,
Adenocarcinoma	pT≥3	pN+	2	R1	0
Adenocarcinoma	pT≥3	pN0	2	R0	0
Adenocarcinoma	pT≥3	pN+	2	R0	2	100
Adenocarcinoma	pT2	pN0	2		,
Adenocarcinoma	pT≥3	pN+	2	R0	3	60
Adenocarcinoma	pT≥3	pN+	2	R1	1	100
Adenocarcinoma	pT≥3	pN+	2	R0	,
Adenocarcinoma	pT≥3	pN+	2	R1	1	100
Adenocarcinoma	pT≥3			R1	0
Adenocarcinoma	pT≥3	pN0	2	R0	1	20
Adenocarcinoma	pT≥3	pN+	2	R1	1	10
Adenocarcinoma	pT≥3	pN0		R1	0
Adenocarcinoma	pT≥3	pN+	2	R0	1	80
Adenocarcinoma	pT≥3	pN0	2	R1	0
Adenocarcinoma	pT≥3	pN+	2	R1	0
Adenocarcinoma	pT≥3	pN+	2	R0	1	70
Adenocarcinoma	pT≥3	pN+	2	R1	1	70
Adenocarcinoma	pT≥3	pN+	2	R1	,
Adenocarcinoma	pT≥3	pN+	2	R1	0
Adenocarcinoma	pT≥3	pN+	2	R0	1	20
Adenocarcinoma	pT≥3	pN+	2	R1	,
Adenocarcinoma	pT≥3	pN+	2	R1	1	10
Adenocarcinoma	pT≥3	pN+	2	R0	2	100
Adenocarcinoma	pT≥3	pN+	2	R1	1	70
Adenocarcinoma	pT≥3	pN+	2	R1	1	70
Adenocarcinoma	pT≥3	pN0	2	R1	2	100
Adenocarcinoma	pT≥3	pN+	2	R0	0
Adenocarcinoma	pT≥3	pN+	2		4
Adenocarcinoma	pT≥3	pN+	2	R0	3	80
Adenocarcinoma	pT≥3	pN+	2	R1	2	50
Adenocarcinoma	pT≥3	pN+	2	R0	0
Adenocarcinoma	pT≥3	pN+	2	R1	,
Adenocarcinoma	pT≥3	pN+	2	R0	,
Adenocarcinoma	pT≥3	pN+	2	R0	3	100
Adenocarcinoma	pT≥3	pN+	2	R1	,
Adenocarcinoma	pT≥3	pN+	2	R1	2	100
Adenocarcinoma	pT≥3	pN+	2	R1	1	10
Adenocarcinoma	pT≥3	pN0	2	R1	2	70
Adenocarcinoma	pT≥3	pN+	2	R1	1	50
Adenocarcinoma	pT≥3	pN0	2	R1	2	70
Adenocarcinoma	pT≥3	pN0	2	R1	1	20
Adenocarcinoma	pT≥3	pN+	2	R1	,
Adenocarcinoma	pT≥3	pN+	2	R0	0
Adenocarcinoma	pT≥3	pN+	2	R0	1	20
Adenocarcinoma	pT≥3	pN0	2	R1	1	50
Adenocarcinoma	pT≥3	pN+	2	R1	0
Adenocarcinoma	pT≥3	pN+	2	R1	0
Adenocarcinoma	pT≥3	pN+	2		3	100
Adenocarcinoma	pT≥3	pN0	2		,
Adenocarcinoma	pT≥3	pN+	2	R1	,
Adenocarcinoma	pT≥3	pN+	2	R0	3	50
Adenocarcinoma	pT≥3	pN+	2	R1	0
Adenocarcinoma	pT≥3	pN+		R1	0
Adenocarcinoma	pT≥3	pN+	2	R0	1	50
Adenocarcinoma	pT≥3	pN+	2	R1	0
Adenocarcinoma	pT≥3	pN+	2	R0	2	100
Adenocarcinoma	pT≥3	pN+	2	R1	0
Adenocarcinoma	pT≥3	pN+	2	R1	0
Adenocarcinoma	pT≥3	pN+	2		0
Adenocarcinoma	pT≥3	pN+	2	R1	2	100
Adenocarcinoma	pT≥3	pN+	2		2	40
Adenocarcinoma	pT≥3	pN+	2	R0	3	80
Adenocarcinoma	pT≥3	pN+	2	R1	0
Adenocarcinoma	pT≥3	pN+		R1	,
Adenocarcinoma	pT≥3	pN+	2	R0	1	80
Adenocarcinoma	pT≥3	pN+	2	R1	1	10
Adenocarcinoma	pT≥3	pN0	2	R0	1	50
Adenocarcinoma	pT≥3	pN+	2	R0	0
Adenocarcinoma	pT≥3	pN+	2	R1	0
Adenocarcinoma	pT≥3	pN+	2	R1	1	10
Adenocarcinoma	pT≥3	pN+	2	R0	,
Adenocarcinoma	pT≥3	pN+	2	R1	,
Adenocarcinoma	pT≥3	pN+	2	R0	1	10
Adenocarcinoma	pT≥3	pN0	2		3	100
Adenocarcinoma	pT≥3	pN+	2	R0	0
Adenocarcinoma	pT≥3	pN+	2	R1	3	50
Adenocarcinoma	pT≥3	pN+	2	R1	0
Adenocarcinoma	pT≥3	pN+	2	R0	0
Adenocarcinoma	pT≥3	pN+	2	R1	3	100
Adenocarcinoma	pT≥3	pN+	2	R0	0
Adenocarcinoma	pT≥3	pN+		R1	0
Adenocarcinoma	pT≥3	pN+	2	R0	0
Adenocarcinoma	pT≥3	pN+	2	R0	0
Adenocarcinoma	pT≥3	pN+	2	R1	2	70
Adenocarcinoma	pT≥3	pN+	2	R0	0
Adenocarcinoma	pT≥3	pN+	2	R1	0
Adenocarcinoma	pT≥3	pN0		R1	0
Adenocarcinoma	pT≥3	pN+	2	R1	3	100
Adenocarcinoma	pT≥3	pN+	2	R0	1	100
Adenocarcinoma	pT1	pN+	2	R0	1	70
Adenocarcinoma	pT≥3	pN+	2	R1	3	20
Adenocarcinoma	pT≥3	pN+	2	R1	2	70
Adenocarcinoma	pT≥3	pN0	2	R0	1	20
Adenocarcinoma	pT≥3	pN+	2	R0	0
Adenocarcinoma	pT≥3	pN+	2	R0	0
Adenocarcinoma	pT≥3	pN+	2	R1	0
Adenocarcinoma	pT≥3	pN0	2	R0	1	10
Adenocarcinoma	pT≥3	pN+		R1	2	70
Adenocarcinoma	pT≥3	pN+	2	R1	0
Adenocarcinoma	pT≥3	pN+	2	R1	2	70
Adenocarcinoma	pT≥3	pN+		R1	1	30
Adenocarcinoma	pT≥3	pN+	2	R1	1	5
Adenocarcinoma	pT≥3	pN+	2	R0	0
Adenocarcinoma	pT≥3	pN+	2	R1	0
Adenocarcinoma	pT≥3	pN+	2	R1	2	10
Adenocarcinoma	pT≥3	pN+	2	R0	1	30
Adenocarcinoma	pT≥3	pN+	2	R0	2	70
Adenocarcinoma	pT≥3	pN+	2	R0	1	70
Adenocarcinoma	pT≥3	pN+	2	R0	0
Adenocarcinoma	pT≥3	pN+	2	R0	0
Adenocarcinoma	pT≥3	pN+	2	R1	1	30
Adenocarcinoma	pT≥3	pN+	2	R1	0
Adenocarcinoma	pT≥3	pN0	2	R1	1	100
Adenocarcinoma	pT≥3	pN+	2	R1	1	20
Adenocarcinoma	pT≥3	pN0	2	R0	0
Adenocarcinoma	pT≥3	pN+	2	R0	0
Adenocarcinoma	pT≥3	pN+	2	R0	1	10
Adenocarcinoma	pT≥3	pN+	2	R1	2	100
Adenocarcinoma	pT≥3	pN+	2	R0	3	100
Adenocarcinoma	pT≥3	pN+	2	R0	2	100
Adenocarcinoma	pT≥3	pN0		R1	1	10
Adenocarcinoma	pT≥3		2	R1	1	30
Adenocarcinoma	pT≥3	pN0	2	R0	3	100
Adenocarcinoma	pT≥3	pN0	2	R1	1	20
Adenocarcinoma	pT2	pN+	2	R0	0
Adenocarcinoma	pT≥3	pN+	2	R1	1	5
Adenocarcinoma	pT≥3	pN0	2	R0	0
Adenocarcinoma	pT≥3	pN+	2	R0	2	100
Adenocarcinoma	pT≥3	pN+	2		,
Adenocarcinoma	pT≥3	pN+	2	R0	,
Adenocarcinoma	pT≥3	pN+	2	R0	1	10
Adenocarcinoma	pT≥3	pN+	2		0
Adenocarcinoma	pT≥3	pN0	2	R1	,
Adenocarcinoma	pT≥3	pN+	2		,
Adenocarcinoma	pT≥3	pN+		R1	0
Adenocarcinoma	pT≥3	pN+	2		,
Adenocarcinoma	pT≥3	pN+	2	R0	0
Adenocarcinoma	pT≥3	pN+	2	R0	3	100
Adenocarcinoma	pT≥3	pN+		R0	,
Adenocarcinoma	pT≥3	pN0	2	R0	0
Adenocarcinoma	pT≥3	pN+	2	R0	1	30
Adenocarcinoma	pT≥3	pN0	2	R0	1	20
Adenocarcinoma	pT≥3	pN+	2	R0	2	70
Adenocarcinoma	pT≥3	pN+	2	R1	0
Adenocarcinoma	pT≥3	pN+	2	R0	0
Adenocarcinoma	pT≥3	pN+	2	R0	,
Adenocarcinoma	pT≥3	pN0	2	R0	1	100
Adenocarcinoma	pT≥3	pN0		R1	0
Adenocarcinoma	pT≥3	pN+	2	R1	1	70
Adenocarcinoma	pT≥3	pN+	2	R1	1	20
Adenocarcinoma	pT≥3	pN+		R1	0
Adenocarcinoma	pT≥3	pN0	2	R0	0
Adenocarcinoma	pT≥3	pN+	2	R0	3	30
Adenocarcinoma	pT≥3	pN+	2	R0	1	70
Adenocarcinoma	pT≥3	pN+	2	R1	,
Adenocarcinoma	pT≥3	pN0	2	R0	2	100
Adenocarcinoma	pT≥3	pN+	2	R0	2	100
Adenocarcinoma	pT≥3	pN0	2	R0	,
Adenocarcinoma	pT≥3	pN+	2	R1	1	100
Adenocarcinoma	pT≥3	pN+	2	R0	2	100
Adenocarcinoma	pT≥3	pN+	2	R1	1	30
Adenocarcinoma	pT1	pN+	2	R0	2	100
Adenocarcinoma	pT≥3	pN0	2	R0	0
Adenocarcinoma	pT≥3	pN+	2	R1	1	100
Adenocarcinoma	pT1	pN0	2	R0	2	30
Adenocarcinoma	pT2	pN+	2	R0	2	50
Adenocarcinoma	pT≥3	pN+	2	R1	0
Adenocarcinoma	pT2	pN0	2	R1	0
Adenocarcinoma	pT≥3	pN+	2	R1	3	100
Adenocarcinoma	pT≥3	pN+	2	R1	2	20
Adenocarcinoma	pT≥3	pN+	2	R1	0
Adenocarcinoma	pT≥3	pN+	2	R0	2	80
Adenocarcinoma	pT≥3	pN0	2	R1	0
Adenocarcinoma	pT≥3	pN+	2	R1	1	70
Adenocarcinoma	pT≥3	pN+	2	R0	4
Adenocarcinoma	pT≥3	pN+	2	R0	1	10
Adenocarcinoma	pT≥3	pN0	2	R0	1	50
Adenocarcinoma	pT≥3	pN+	2	R1	1	100
Adenocarcinoma	pT≥3	pN+	2	R0	1	100
Adenocarcinoma	pT≥3	pN+	2	R0	1	10
Adenocarcinoma	pT2	pN+	2	R0	0
Adenocarcinoma	pT≥3	pN+	2	R0	0
Adenocarcinoma	pT≥3	pN+	2	R1	1	100
Adenocarcinoma	pT≥3	pN+	2	R0	0
Adenocarcinoma	pT≥3	pN+	2	R0	,
Adenocarcinoma	pT≥3	pN+	2	R1	1	5
Adenocarcinoma	pT≥3	pN+	2	R0	,
Adenocarcinoma	pT≥3	pN+	2	R0	1	40
Adenocarcinoma	pT≥3	pN+	2	R1	2	100
Adenocarcinoma	pT≥3	pN+	2	R0	2	50
Adenocarcinoma	pT≥3	pN+	2	R0	0
Adenocarcinoma	pT≥3	pN+	2	R0	0
Adenocarcinoma	pT≥3	pN0	2	R0	3	70
Adenocarcinoma	pT≥3	pN+	2	R0	1	70
Adenocarcinoma	pT≥3	pN+	2	R1	1	20
Adenocarcinoma	pT≥3	pN+	2	R0	0
Adenocarcinoma	pT≥3	pN0	2	R0	2	60
Adenocarcinoma	pT≥3	pN+	2		0
Adenocarcinoma	pT≥3	pN+	2	R0	2	50
Adenocarcinoma	pT≥3	pN0	2	R1	0
Adenocarcinoma	pT≥3	pN+	2	R1	1	30
Adenocarcinoma	pT≥3	pN+	2	R1	1	10
Adenocarcinoma	pT≥3	pN0	2	R1	,
Adenocarcinoma	pT≥3	pN0	2	R0	0
Adenocarcinoma	pT≥3	pN+	2	R0	0
Adenocarcinoma	pT≥3	pN+	2	R0	,
Adenocarcinoma	pT≥3	pN+	2	R0	0
Adenocarcinoma	pT≥3	pN+	2	R0	0
Adenocarcinoma	pT≥3	pN0	2	R0	,
Adenocarcinoma	pT≥3	pN+	2	R1	1	10
Adenocarcinoma	pT≥3	pN+	2	R0	0
Adenocarcinoma	pT≥3	pN0	2	R1	0
Adenocarcinoma	pT≥3	pN0	2	R0	,
Adenocarcinoma	pT≥3	pN0	2	R1	0
Adenocarcinoma	pT≥3	pN0	2	R0	,
Adenocarcinoma	pT≥3	pN+	2	R1	2	100
Adenocarcinoma	pT≥3	pN+	2		1	100
Adenocarcinoma	pT≥3	pN0	2	R0	,
Adenocarcinoma	pT≥3	pN0	2	R0	0
Adenocarcinoma	pT≥3	pN+	2	R0	1	40
Adenocarcinoma	pT≥3	pN0	2	R1	2	40
Adenocarcinoma	pT≥3	pN+	2	R1	1	100
Adenocarcinoma	pT≥3	pN0	2	R0	0
Adenocarcinoma	pT≥3	pN0	2	R1	0
Adenocarcinoma	pT≥3	pN+	2	R0	1	80
Adenocarcinoma	pT≥3	pN+	2		2	10
Adenocarcinoma	pT≥3	pN+	2		2	5
Adenocarcinoma	pT≥3	pN+	2	R0	0
Adenocarcinoma	pT≥3	pN+	2	R0	0
Adenocarcinoma	pT≥3	pN+	2		,
Adenocarcinoma	pT≥3	pN0	2	R0	0
Adenocarcinoma	pT≥3	pN+	2	R1	,
Adenocarcinoma	pT2	pN+	2		0
Adenocarcinoma	pT2	pN+	2	R0	2	60
Adenocarcinoma	pT2	pN+	2	R0	0
Adenocarcinoma	pT2	pN+	2	R0	4
Adenocarcinoma	pT≥3	pN0	2		0
Adenocarcinoma	pT1	pN0	2	R0	2	100
Adenocarcinoma	pT≥3	pN+	2	R1	1	100
Adenocarcinoma	pT≥3	pN+	2	R1	2	20
Adenocarcinoma	pT2	pN0	2	R0	,
Adenocarcinoma	pT2	pN0	2	R1	2	30
Adenocarcinoma	pT≥3	pN0	2	R0	3	100
Adenocarcinoma	pT2	pN+	2	R0	2	40
Adenocarcinoma	pT≥3	pN+	2	R1	1	80
Adenocarcinoma	pT2	pN+	2	R1	2	100
Adenocarcinoma	pT2	pN+	2	R0	2	100
Adenocarcinoma	pT≥3	pN+	2		2	100
Adenocarcinoma	pT2	pN+	2	R0	1	5
Adenocarcinoma	pT2	pN0		R0	0
Adenocarcinoma	pT≥3	pN+	2	R0	3	30
Adenocarcinoma	pT2	pN0	2	R1	0
Adenocarcinoma	pT2	pN+	2	R0	2	20
Adenocarcinoma	pT≥3	pN+	2	R1	2	100
Adenocarcinoma	pT≥3	pN0	2	R1	2	100
Adenocarcinoma	pT≥3	pN+	2	R1	2	10
Adenocarcinoma	pT≥3	pN+	2	R1	3	20
Adenocarcinoma	pT2	pN+	2	R0	1	5
Adenocarcinoma	pT2	pN+	2	R0	3	70
Adenocarcinoma	pT2	pN0	2	R0	2	100
Adenocarcinoma	pT2	pN+	2	R1	0
Adenocarcinoma	pT≥3	pN0	2	R1	,
Adenocarcinoma	pT≥3	pN+	2	R1	0
Adenocarcinoma	pT≥3	pN+	2	R0	,
Adenocarcinoma	pT≥3	pN+	2	R1	2	100
Adenocarcinoma	pT≥3	pN+	2		0
Adenocarcinoma	pT2	pN+	2	R1	1	10
Adenocarcinoma	pT2	pN+	2	R0	0
Adenocarcinoma	pT2	pN+	2	R0	0
Adenocarcinoma	pT2	pN+	2	R0	1	70
Adenocarcinoma	pT2	pN+	2	R0	2	70
Adenocarcinoma	pT2	pN+	2	R0	4
Adenocarcinoma	pT≥3	pN+		R1	2	100
Adenocarcinoma	pT≥3	pN0	2	R1	0
Adenocarcinoma	pT2	pN0	2	R0	0
Adenocarcinoma	pT2	pN+	2	R0	,
Adenocarcinoma	pT≥3	pN+	2	R1	0
Adenocarcinoma	pT2	pN+	2	R0	1	50
Adenocarcinoma	pT2	pN+	2	R1	1	70
Adenocarcinoma	pT≥3	pN+	2	R1	2	40
Adenocarcinoma	pT≥3	pN+	2	R0	0
Adenocarcinoma	pT≥3	pN+	2	R0	1	10
Adenocarcinoma	pT2	pN+	2	R0	,
Adenocarcinoma	pT2	pN+	2	R0	1	50
Adenocarcinoma	pT≥3	pN+	2	R1	3	100
Adenocarcinoma	pT2	pN0	2	R1	,
Adenocarcinoma	pT≥3	pN+	2	R0	1	100
Adenocarcinoma	pT2	pN+	2	R1	1	30
Adenocarcinoma	pT≥3	pN+	2		0
Adenocarcinoma	pT2	pN0	2	R0	4
Adenocarcinoma	pT2	pN+	2	R0	1	100
Adenocarcinoma	pT2	pN+	2	R0	0
Adenocarcinoma	pT≥3	pN+	2	R0	2	100
Adenocarcinoma	pT2	pN+	2	R1	1	30
Adenocarcinoma	pT2	pN0	2	R0	,
Adenocarcinoma	pT≥3	pN+	2	R0	2	40
Adenocarcinoma	pT≥3	pN+		R0	0
Adenocarcinoma	pT2	pN+	2	R0	0
Adenocarcinoma	pT≥3	pN+	2	R0	1	30
Adenocarcinoma	pT2	pN+	2	R0	2	50
Adenocarcinoma	pT≥3	pN+	2	R1	0
Adenocarcinoma	pT≥3	pN+	2	R0	3	50
Adenocarcinoma	pT2	pN0	2	R0	1	50
Adenocarcinoma	pT≥3	pN+	2		0
Adenocarcinoma	pT2	pN+	2	R0	3	20
Adenocarcinoma	pT2	pN+	2	R0	2	70
Adenocarcinoma	pT≥3	pN+	2	R0	0
Adenocarcinoma	pT≥3	pN+	2	R1	0
Adenocarcinoma	pT≥3	pN+	2		2	70
Adenocarcinoma	pT2	pN+	2	R0	0
Adenocarcinoma	pT2	pN0	2	R0	4
Adenocarcinoma	pT≥3	pN+	2	R1	2	50
Adenocarcinoma	pT1	pN+	2	R0	2	100
Adenocarcinoma	pT≥3	pN+	2	R1	0
Adenocarcinoma	pT≥3	pN+	2		0
Adenocarcinoma	pT1	pN+	2	R0	0
Adenocarcinoma	pT2	pN+	2	R0	0
Adenocarcinoma	pT1	pN+	2	R0	,
Adenocarcinoma	pT≥3	pN+	2	R0	0
Adenocarcinoma	pT2	pN+	2		0
Adenocarcinoma	pT2	pN+	2		0
Adenocarcinoma	pT2	pN+	2	R0	2	70
Adenocarcinoma	pT1	pN+	2	R0	3	100
Adenocarcinoma	pT1	pN+	2	R0	4
Adenocarcinoma	pT2	pN+	2	R0	3	70
Adenocarcinoma	pT2	pN+	2	R0	2	50
Adenocarcinoma	pT2	pN+	2	R0	1	10
Adenocarcinoma	pT≥3	pN+	2	R0	4
Adenocarcinoma	pT2	pN+	2	R0	2	100
Adenocarcinoma	pT2	pN0	2	R0	1	30
Adenocarcinoma	pT2	pN+	2		0
Adenocarcinoma	pT≥3	pN+	2	R1	,
Adenocarcinoma	pT≥3	pN+	2	R1	0
Adenocarcinoma	pT≥3	pN+	2	R0	0
Adenocarcinoma	pT≥3	pN+	2	R0	0
Adenocarcinoma	pT≥3	pN+	2	R1	0
Adenocarcinoma	pT1	pN0	2	R0	1	80
Adenocarcinoma	pT≥3	pN+	2	R1	2	80
Adenocarcinoma	pT≥3	pN0	2	R0	,
Adenocarcinoma	pT≥3	pN+	2	R1	0
Adenocarcinoma	pT≥3	pN+	2	R0	1	10
Adenocarcinoma	pT≥3	pN0	2	R0	0
Adenocarcinoma	pT≥3	pN+	2	R0	2	70
Adenocarcinoma	pT≥3	pN+	2	R0	0
Adenocarcinoma	pT≥3	pN+	2	R1	1	80
Adenocarcinoma	pT≥3	pN0	2	R1	4
Adenocarcinoma	pT1	pN0	2	R0	2	70
Adenocarcinoma	pT≥3	pN+	2	R1	,
Adenocarcinoma	pT≥3	pN+	2	R0	4
Adenocarcinoma	pT≥3	pN+	2	R0	,
Adenocarcinoma	pT2	pN+	2	R1	1	50
Adenocarcinoma	pT1	pN0	2	R0	1	80
Adenocarcinoma	pT≥3	pN+	2	R0	,
Adenocarcinoma	pT≥3	pN+	2	R0	0
Adenocarcinoma	pT≥3	pN0	2		0
Adenocarcinoma	pT≥3	pN0	3	R0	,
Adenocarcinoma	pT≥3	pN+		R0	0
Adenocarcinoma	pT≥3	pN0	3	R1	2	100
Adenocarcinoma	pT≥3	pN+	3	R1	1	80
Adenocarcinoma	pT≥3	pN+	3	R1	0
Adenocarcinoma	pT≥3	pN+	3	R0	,
Adenocarcinoma	pT≥3	pN+	3	R1	2	100
Adenocarcinoma	pT≥3	pN0		R0	2	50
Adenocarcinoma	pT≥3	pN+	3	R1	2	100
Adenocarcinoma	pT≥3	pN0	3	R1	0
Adenocarcinoma	pT≥3	pN+	3	R1	2	50
Adenocarcinoma	pT≥3	pN0	3		3	30
Adenocarcinoma	pT≥3	pN+	3	R1	1	70
Adenocarcinoma	pT≥3	pN+	3	R0	2	70
Adenocarcinoma	pT≥3	pN0	3	R0	2	70
Adenocarcinoma	pT≥3	pN0	3	R1	0
Adenocarcinoma	pT≥3	pN+	3	R1	1	20
Adenocarcinoma	pT≥3	pN0	3	R0	0
Adenocarcinoma	pT≥3	pN+	3	R1	1	20
Adenocarcinoma	pT≥3	pN+	3	R1	0
Adenocarcinoma	pT≥3	pN+	3	R1	3	70
Adenocarcinoma	pT≥3	pN+	3		0
Adenocarcinoma	pT≥3	pN0	3	R0	1	30
Adenocarcinoma	pT≥3	pN+	3	R1	,
Adenocarcinoma	pT≥3	pN+	3	R1	,
Adenocarcinoma	pT≥3	pN+	3	R1	1	50
Adenocarcinoma	pT≥3	pN0	3	R0	,
Adenocarcinoma	pT≥3	pN0	3	R1	3	100
Adenocarcinoma	pT≥3	pN0	3	R1	2	100
Adenocarcinoma	pT≥3	pN0			4
Adenocarcinoma	pT≥3	pN+	3	R1	1	20
Adenocarcinoma	pT≥3	pN+	3	R0	1	30
Adenocarcinoma	pT≥3	pN+	3	R1	1	70
Adenocarcinoma	pT≥3	pN+	3	R1	1	80
Adenocarcinoma	pT≥3	pN+	3	R1	0
Adenocarcinoma	pT≥3	pN+	3	R1	0
Adenocarcinoma	pT≥3	pN+	3	R1	0
Adenocarcinoma	pT≥3	pN+	3	R0	0
Adenocarcinoma	pT≥3	pN+	3	R0	,
Adenocarcinoma	pT≥3	pN+	3		0
Adenocarcinoma	pT≥3	pN+	3	R0	3	80
Adenocarcinoma	pT≥3	pN+	3	R0	1	20
Adenocarcinoma	pT≥3	pN+	3	R1	,
Adenocarcinoma	pT≥3	pN+	3	R0	,
Adenocarcinoma	pT≥3	pN+	3	R0	1	50
Adenocarcinoma	pT≥3	pN+	3	R0	0
Adenocarcinoma	pT≥3	pN+	3	R1	2	70
Adenocarcinoma	pT≥3	pN+	3	R0	0
Adenocarcinoma	pT≥3	pN+	3	R0	2	100
Adenocarcinoma	pT≥3	pN+	3	R1	0
Adenocarcinoma	pT≥3	pN+	3	R1	1	10
Adenocarcinoma	pT≥3	pN+	3	R1	1	5
Adenocarcinoma	pT≥3	pN+	3	R1	0
Adenocarcinoma	pT≥3	pN+	3	R1	0
Adenocarcinoma	pT≥3	pN+	3	R0	,
Adenocarcinoma	pT≥3	pN+	3	R1	1	20
Adenocarcinoma	pT≥3	pN+	3	R0	,
Adenocarcinoma	pT≥3	pN+	3		3	100
Adenocarcinoma	pT≥3	pN0	3		1	100
Adenocarcinoma	pT≥3	pN+	3	R0	2	70
Adenocarcinoma	pT≥3	pN+	3	R1	1	10
Adenocarcinoma	pT≥3	pN+	3	R0	2	100
Adenocarcinoma	pT≥3	pN+	3	R0	3	100
Adenocarcinoma	pT≥3	pN0	3		0
Adenocarcinoma	pT≥3	pN+	3	R1	1	5
Adenocarcinoma	pT≥3	pN+		R1	1	70
Adenocarcinoma	pT≥3	pN+	3	R0	0
Adenocarcinoma	pT≥3	pN+	3	R1	1	30
Adenocarcinoma	pT≥3	pN0	3	R0	3	100
Adenocarcinoma	pT≥3	pN+	3	R0	1	100
Adenocarcinoma	pT≥3	pN+	3		3	100
Adenocarcinoma	pT≥3	pN0	3	R0	1	20
Adenocarcinoma	pT≥3	pN+	3	R0	2	100
Adenocarcinoma	pT≥3	pN+	3	R0	1	100
Adenocarcinoma	pT2	pN0	3	R1	0
Adenocarcinoma	pT≥3	pN+	3	R1	1	100
Adenocarcinoma	pT≥3	pN+	3	R1	1	20
Adenocarcinoma	pT≥3	pN+	3	R1	2	30
Adenocarcinoma	pT≥3	pN0	3	R1	0
Adenocarcinoma	pT≥3	pN+	3	R0	2	100
Adenocarcinoma	pT≥3	pN+	3	R1	0
Adenocarcinoma	pT1	pN0		R0	,
Adenocarcinoma	pT≥3	pN+	3	R0	1	10
Adenocarcinoma	pT≥3	pN+	3	R0	,
Adenocarcinoma	pT≥3	pN+	3	R1	,
Adenocarcinoma	pT≥3	pN+	3	R1	2	50
Adenocarcinoma	pT≥3	pN+	3	R1	1	40
Adenocarcinoma	pT≥3	pN+	3	R0	,
Adenocarcinoma	pT≥3	pN+	3	R1	1	30
Adenocarcinoma	pT≥3	pN+	3	R0	1	70
Adenocarcinoma	pT≥3	pN+	3	R1	0
Adenocarcinoma	pT≥3	pN+	3	R1	2	100
Adenocarcinoma	pT≥3	pN+	3	R1	1	30
Adenocarcinoma	pT≥3	pN0	3	R1	1	10
Adenocarcinoma	pT1	pN+	3	R1	1	10
Adenocarcinoma	pT≥3	pN+		R1	1	50
Adenocarcinoma	pT2	pN+	3	R0	1	5
Adenocarcinoma	pT≥3	pN+	3	R0	2	70
Adenocarcinoma	pT2	pN+	3	R0	2	60
Adenocarcinoma	pT2	pN+	3		1	20
Adenocarcinoma	pT≥3	pN+	3	R0	2	100
Adenocarcinoma	pT2	pN+	3	R0	3	100
Adenocarcinoma	pT2	pN+	3	R0	1	100
Adenocarcinoma	pT2	pN0	3	R0	1	100
Adenocarcinoma	pT≥3	pN+	3	R1	0
Adenocarcinoma	pT2	pN0	3	R1	0
Adenocarcinoma	pT2	pN+	3	R0	2	70
Adenocarcinoma	pT≥3	pN+	3	R0	0
Adenocarcinoma	pT≥3	pN+	3	R0	2	100
Adenocarcinoma	pT≥3	pN0	3	R0	1	30
Adenocarcinoma	pT≥3	pN+	3	R1	,
Adenocarcinoma	pT≥3	pN+	3	R1	0
Adenocarcinoma	pT≥3	pN+	3	R0	1	10
Adenocarcinoma	pT≥3	pN0	3	R0	,
Adenocarcinoma	pT≥3	pN0	3	R1	,
Adenocarcinoma	pT≥3	pN+	3	R0	,
Adenocarcinoma	pT2	pN0	3	R0	2	100
Adenocarcinoma	pT≥3	pN+		R0	0
Adenocarcinoma					0
Adenocarcinoma	pT1	pN+		R0	0
Azinus cell carcinoma	pT≥3	pN+		R1	0
Azinus cell carcinoma	pT≥3	pN0		R0	0
Azinus cell carcinoma	pT≥3	pN+		R1	0
Azinus cell carcinoma	pT2	pN0		R0	0
Azinus cell carcinoma	pT≥3	pN0	2	R0	0
Azinus cell carcinoma	pT≥3	pN0	3	R1	0
Papilla vateri carcinoma	pT2	pN0	1	R0	,
Papilla vateri carcinoma	pT2	pN+	1	R0	,
Papilla vateri carcinoma	pT≥3	pN+	2	R0	,
Papilla vateri carcinoma	pT2	pN+	2	R0	,
Papilla vateri carcinoma	pT≥3	pN+	2	R1	2	30
Papilla vateri carcinoma	pT≥3	pN+	2	R0	0
Papilla vateri carcinoma	pT≥3	pN+	2	R0	0
Papilla vateri carcinoma	pT≥3	pN0	2	R0	2	40
Papilla vateri carcinoma	pT≥3	pN+	2	R0	0
Papilla vateri carcinoma	pT≥3	pN+	2	R0	0
Papilla vateri carcinoma	pT≥3	pN+	2	R1	0
Papilla vateri carcinoma	pT2	pN+	2	R0	,
Papilla vateri carcinoma	pT≥3	pN+	2	R1	0
Papilla vateri carcinoma	pT≥3	pN+	2	R0	0
Papilla vateri carcinoma	pT≥3	pN+	2	R0	0
Papilla vateri carcinoma	pT≥3	pN+	2	R0	0
Papilla vateri carcinoma	pT≥3	pN0	2	R0	2	70
Papilla vateri carcinoma	pT1	pN+	2	R0	1	50
Papilla vateri carcinoma	pT≥3	pN+	2	R0	0
Papilla vateri carcinoma	pT≥3	pN+	2	R0	1	80
Papilla vateri carcinoma	pT2	pN0	2	R0	1	20
Papilla vateri carcinoma	pT2	pN+	2	R0	2	70
Papilla vateri carcinoma	pT≥3	pN+	2	R0	2	100
Papilla vateri carcinoma	pT≥3	pN+	2	R0	2	100
Papilla vateri carcinoma	pT2	pN+	2	R0	1	50
Papilla vateri carcinoma	pT≥3	pN+	2	R0	0
Papilla vateri carcinoma	pT≥3	pN+	2	R0	0
Papilla vateri carcinoma	pT≥3	pN+	2	R0	0
Papilla vateri carcinoma	pT1	pN+	2	R0	2	100
Papilla vateri carcinoma	pT≥3	pN+	2	R0	0
Papilla vateri carcinoma	pT≥3	pN+	2	R0	0
Papilla vateri carcinoma	pT≥3	pN0	2	R1	0
Papilla vateri carcinoma	pT≥3	pN+	2	R0	0
Papilla vateri carcinoma	pT≥3	pN+	2	R1	1	20
Papilla vateri carcinoma	pT2	pN+	2	R0	2	70
Papilla vateri carcinoma	pT≥3	pN+	2	R1	0
Papilla vateri carcinoma	pT2	pN+	2	R0	,
Papilla vateri carcinoma	pT2	pN0	2	R0	,
Papilla vateri carcinoma	pT2	pN0	2	R0	2	70
Papilla vateri carcinoma	pT2	pN0	2	R0	,
Papilla vateri carcinoma	pT1	pN0	2	R0	,
Papilla vateri carcinoma	pT1	pN0	2	R0	1	30
Papilla vateri carcinoma	pT2	pN+	2	R0	4
Papilla vateri carcinoma	pT≥3	pN0	3	R0	0
Papilla vateri carcinoma	pT≥3	pN+	3	R0	2	30
Papilla vateri carcinoma	pT2	pN0	3	R0	0
Papilla vateri carcinoma	pT≥3	pN+	3	R0	0
Papilla vateri carcinoma	pT≥3	pN+	3	R0	0
Papilla vateri carcinoma	pT≥3	pN+	3	R0	0
Papilla vateri carcinoma	pT≥3	pN+	3	R1	0
Papilla vateri carcinoma	pT≥3	pN+	3	R0	3	100
Papilla vateri carcinoma	pT≥3	pN+	3	R0	0
Papilla vateri carcinoma	pT≥3	pN+	3	R0	3	100
Papilla vateri carcinoma	pT2	pN+	3	R0	3	100
Papilla vateri carcinoma	pT≥3	pN+	3	R0	0
Papilla vateri carcinoma	pT2	pN0	3	R0	0
Papilla vateri carcinoma	pT≥3	pN0	3	R0	0
Papilla vateri carcinoma	pT≥3	pN+	3		1	10
Papilla vateri carcinoma	pT≥3	pN+	3	R0	1	50
Papilla vateri carcinoma	pT2	pN0	3	R0	2	70
Papilla vateri carcinoma	pT≥3	pN+	3	R0	0
